# Supplementary material
Source: PubMed Central journal article supplement (PMC4921274)
Supplement: NIHMS748312-supplement.pdf [file NIHMS748312-supplement.pdf]

**MASSACHUSETTS MEDICAL ORDERS  
for LIFE-SUSTAINING TREATMENT**

(MOLST) [www.molst-ma.org](http://www.molst-ma.org)

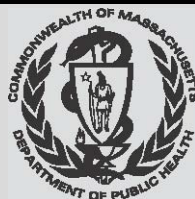

Patient's Name \_\_\_\_\_

Date of Birth \_\_\_\_\_

Medical Record Number if applicable: \_\_\_\_\_

**INSTRUCTIONS:** *Every patient should receive full attention to comfort.*

- This form should be signed based on goals of care discussions between the patient (or patient's representative signing below) and the patient's clinician.
- Sections A–C are valid orders only if Sections D and E are complete. Section F is valid only if Sections G and H are complete.
- If a section is not completed, there is no limitation on the treatment indicated in that section.
- The form is effective immediately upon signature. Photocopy, fax or electronic copies of properly signed MOLST forms are valid.

|                                                                                                                                                                                     |                                                                                                                                                                                                                                                                                                                                                                                                                                                                                                                                                                                                                                                                                                                                                                                                                                                                                                                                                                                                                                  |
|-------------------------------------------------------------------------------------------------------------------------------------------------------------------------------------|----------------------------------------------------------------------------------------------------------------------------------------------------------------------------------------------------------------------------------------------------------------------------------------------------------------------------------------------------------------------------------------------------------------------------------------------------------------------------------------------------------------------------------------------------------------------------------------------------------------------------------------------------------------------------------------------------------------------------------------------------------------------------------------------------------------------------------------------------------------------------------------------------------------------------------------------------------------------------------------------------------------------------------|
| <p><b>A</b></p> <p>Select one circle →</p>                                                                                                                                          | <p><b>CARDIOPULMONARY RESUSCITATION: for a patient in cardiac or respiratory arrest</b></p> <p style="text-align: center;"> <input type="radio"/> Do Not Resuscitate                 <span style="margin-left: 200px;"><input type="radio"/> Attempt Resuscitation</span> </p>                                                                                                                                                                                                                                                                                                                                                                                                                                                                                                                                                                                                                                                                                                                                                   |
| <p><b>B</b></p> <p>Select one circle →</p>                                                                                                                                          | <p><b>VENTILATION: for a patient in respiratory distress</b></p> <p style="text-align: center;"> <input type="radio"/> Do Not Intubate and Ventilate                 <span style="margin-left: 150px;"><input type="radio"/> Intubate and Ventilate</span> </p> <hr style="border-top: 1px dashed black;"/> <p style="text-align: center;"> <input type="radio"/> Do Not Use Non-invasive Ventilation (e.g. CPAP)                 <span style="margin-left: 150px;"><input type="radio"/> Use Non-invasive Ventilation (e.g. CPAP)</span> </p>                                                                                                                                                                                                                                                                                                                                                                                                                                                                                   |
| <p><b>C</b></p> <p>Select one circle →</p>                                                                                                                                          | <p><b>TRANSFER TO HOSPITAL</b></p> <p style="text-align: center;"> <input type="radio"/> Do Not Transfer to Hospital (<i>unless needed for comfort</i>)                 <span style="margin-left: 100px;"><input type="radio"/> Transfer to Hospital</span> </p>                                                                                                                                                                                                                                                                                                                                                                                                                                                                                                                                                                                                                                                                                                                                                                 |
| <p><b>PATIENT</b><br/>or patient's<br/>representative<br/>signature</p> <p><b>D</b></p> <p><i>Required</i></p> <p>Select circle and fill<br/>in every line<br/>for valid orders</p> | <p>Select one circle below to indicate who is signing Section D:<br/> <input type="radio"/> Patient     <input type="radio"/> Health Care Agent     <input type="radio"/> Guardian*     <input type="radio"/> Parent/Guardian* of minor</p> <p>Signature of patient confirms this form was signed of patient's own free will and reflects his/her wishes and goals of care as expressed to the Section E signer. Signature by the patient's representative (indicated above) confirms that this form reflects his/her assessment of the patient's wishes and goals of care, or if those wishes are unknown, his/her assessment of the patient's best interests. <i>*A guardian can sign to the extent permitted by MA law. Consult legal counsel with questions about guardian's authority.</i></p> <p><input checked="" type="checkbox"/> _____</p> <p>Signature of Patient (or Person Representing the Patient) _____ Date of Signature _____</p> <p>Legible Printed Name of Signer _____ Telephone Number of Signer _____</p> |
| <p><b>CLINICIAN</b><br/>signature</p> <p><b>E</b></p> <p><i>Required</i></p> <p>Fill in every line for<br/>valid orders</p>                                                         | <p>Signature of physician, nurse practitioner or physician assistant confirms that this form accurately reflects his/her discussion(s) with the signer in Section D.</p> <p><input checked="" type="checkbox"/> _____</p> <p>Signature of Physician, Nurse Practitioner, or Physician Assistant _____ Date of Signature _____</p> <p>Legible Printed Name of Signer _____ Telephone Number of Signer _____</p>                                                                                                                                                                                                                                                                                                                                                                                                                                                                                                                                                                                                                   |
| <p><b>Optional</b></p> <p>Expiration date and<br/>other patient care<br/>contacts</p>                                                                                               | <p><b>This form does not expire unless expressly stated.</b> <i>Expiration date (if any) of this form:</i> _____</p> <p>Health Care Agent Printed Name _____ Telephone Number _____</p> <p>Primary Care Provider Printed Name _____ Telephone Number _____</p>                                                                                                                                                                                                                                                                                                                                                                                                                                                                                                                                                                                                                                                                                                                                                                   |

**SEND THIS FORM WITH THE PATIENT AT ALL TIMES.**  
 HIPAA permits disclosure of MOLST to health care providers as necessary for treatment.

|                     |                                                                                                          |                                                                                                                       |                                                                          |
|---------------------|----------------------------------------------------------------------------------------------------------|-----------------------------------------------------------------------------------------------------------------------|--------------------------------------------------------------------------|
| <b>F</b>            | Statement of Patient Preferences for Other Medically-Indicated Treatments                                |                                                                                                                       |                                                                          |
|                     | <b>INTUBATION AND VENTILATION</b>                                                                        |                                                                                                                       |                                                                          |
| Select one circle → | <input type="radio"/> Refer to Section B on Page 1                                                       | <input type="radio"/> Use intubation and ventilation as checked in Section B, but short term only                     | <input type="radio"/> Undecided<br><input type="radio"/> Did not discuss |
|                     | <b>NON-INVASIVE VENTILATION (e.g. Continuous Positive Airway Pressure - CPAP)</b>                        |                                                                                                                       |                                                                          |
| Select one circle → | <input type="radio"/> Refer to Section B on Page 1                                                       | <input type="radio"/> Use non-invasive ventilation as checked in Section B, but short term only                       | <input type="radio"/> Undecided<br><input type="radio"/> Did not discuss |
|                     | <b>DIALYSIS</b>                                                                                          |                                                                                                                       |                                                                          |
| Select one circle → | <input type="radio"/> No dialysis                                                                        | <input type="radio"/> Use dialysis<br><input type="radio"/> Use dialysis, but short term only                         | <input type="radio"/> Undecided<br><input type="radio"/> Did not discuss |
|                     | <b>ARTIFICIAL NUTRITION</b>                                                                              |                                                                                                                       |                                                                          |
| Select one circle → | <input type="radio"/> No artificial nutrition                                                            | <input type="radio"/> Use artificial nutrition<br><input type="radio"/> Use artificial nutrition, but short term only | <input type="radio"/> Undecided<br><input type="radio"/> Did not discuss |
|                     | <b>ARTIFICIAL HYDRATION</b>                                                                              |                                                                                                                       |                                                                          |
| Select one circle → | <input type="radio"/> No artificial hydration                                                            | <input type="radio"/> Use artificial hydration<br><input type="radio"/> Use artificial hydration, but short term only | <input type="radio"/> Undecided<br><input type="radio"/> Did not discuss |
|                     | Other treatment preferences specific to the patient's medical condition and care _____<br>_____<br>_____ |                                                                                                                       |                                                                          |

|                                                                                                                                                                                                                                                               |                                                                                                                                                                                                                                                                                                                                                                                                                                                                                                                                                                                                                                                                                                                                                                                                          |                            |  |
|---------------------------------------------------------------------------------------------------------------------------------------------------------------------------------------------------------------------------------------------------------------|----------------------------------------------------------------------------------------------------------------------------------------------------------------------------------------------------------------------------------------------------------------------------------------------------------------------------------------------------------------------------------------------------------------------------------------------------------------------------------------------------------------------------------------------------------------------------------------------------------------------------------------------------------------------------------------------------------------------------------------------------------------------------------------------------------|----------------------------|--|
| <p><b>PATIENT</b><br/>or patient's<br/>representative<br/>signature</p> <p style="text-align: center;"><b>G</b></p> <p style="text-align: center;"><i>Required</i></p> <p style="font-size: small;">Select circle and fill in every line for valid orders</p> | <p>Select one circle below to indicate who is signing Section G:</p> <p><input type="radio"/> Patient      <input type="radio"/> Health Care Agent      <input type="radio"/> Guardian*      <input type="radio"/> Parent/Guardian* of minor</p> <p>Signature of patient confirms this form was signed of patient's own free will and reflects his/her wishes and goals of care as expressed to the Section H signer. Signature by the patient's representative (indicated above) confirms that this form reflects his/her assessment of the patient's wishes and goals of care, or if those wishes are unknown, his/her assessment of the patient's best interests. <i>*A guardian can sign to the extent permitted by MA law. Consult legal counsel with questions about guardian's authority.</i></p> |                            |  |
|                                                                                                                                                                                                                                                               | Signature of Patient (or Person Representing the Patient)                                                                                                                                                                                                                                                                                                                                                                                                                                                                                                                                                                                                                                                                                                                                                | Date of Signature          |  |
|                                                                                                                                                                                                                                                               | Legible Printed Name of Signer                                                                                                                                                                                                                                                                                                                                                                                                                                                                                                                                                                                                                                                                                                                                                                           | Telephone Number of Signer |  |

|                                                                                                                                                                                                           |                                                                                                                                                                          |                            |  |
|-----------------------------------------------------------------------------------------------------------------------------------------------------------------------------------------------------------|--------------------------------------------------------------------------------------------------------------------------------------------------------------------------|----------------------------|--|
| <p><b>CLINICIAN</b><br/>signature</p> <p style="text-align: center;"><b>H</b></p> <p style="text-align: center;"><i>Required</i></p> <p style="font-size: small;">Fill in every line for valid orders</p> | <p>Signature of physician, nurse practitioner or physician assistant confirms that this form accurately reflects his/her discussion(s) with the signer in Section G.</p> |                            |  |
|                                                                                                                                                                                                           | Signature of Physician, Nurse Practitioner, or Physician Assistant                                                                                                       | Date of Signature          |  |
|                                                                                                                                                                                                           | Legible Printed Name of Signer                                                                                                                                           | Telephone Number of Signer |  |

**Additional Instructions For Health Care Professionals**

- Follow orders listed in A, B and C and honor preferences listed in F until there is an opportunity for a clinician to review as described below.
- Any change to this form requires the form to be voided and a new form to be signed. To void the form, write VOID in large letters across both sides of the form. *If no new form is completed, no limitations on treatment are documented and full treatment may be provided.*
- Re-discuss the patient's goals for care and treatment preferences as clinically appropriate to disease progression, at transfer to a new care setting or level of care, or if preferences change. Revise the form when needed to accurately reflect treatment preferences.
- The patient or health care agent (if the patient lacks capacity), guardian\*, or parent/guardian\* of a minor can revoke the MOLST form at any time and/or request and receive previously refused medically-indicated treatment.
